# Supplementary material
Source: PubMed Central journal article supplement (PMC2877443)
Supplement: kwq022_1.pdf [file kwq022_1.pdf]

**Web Figure 1.** Approximate locations of study participants' residences (gray dots) and carbon monoxide monitoring sites (black triangles) in the Puget Sound region of western Washington, 1996–2006. Inset shows the area enlarged.
