# Supplementary material
Source: PubMed Central journal article supplement (PMC2877443)

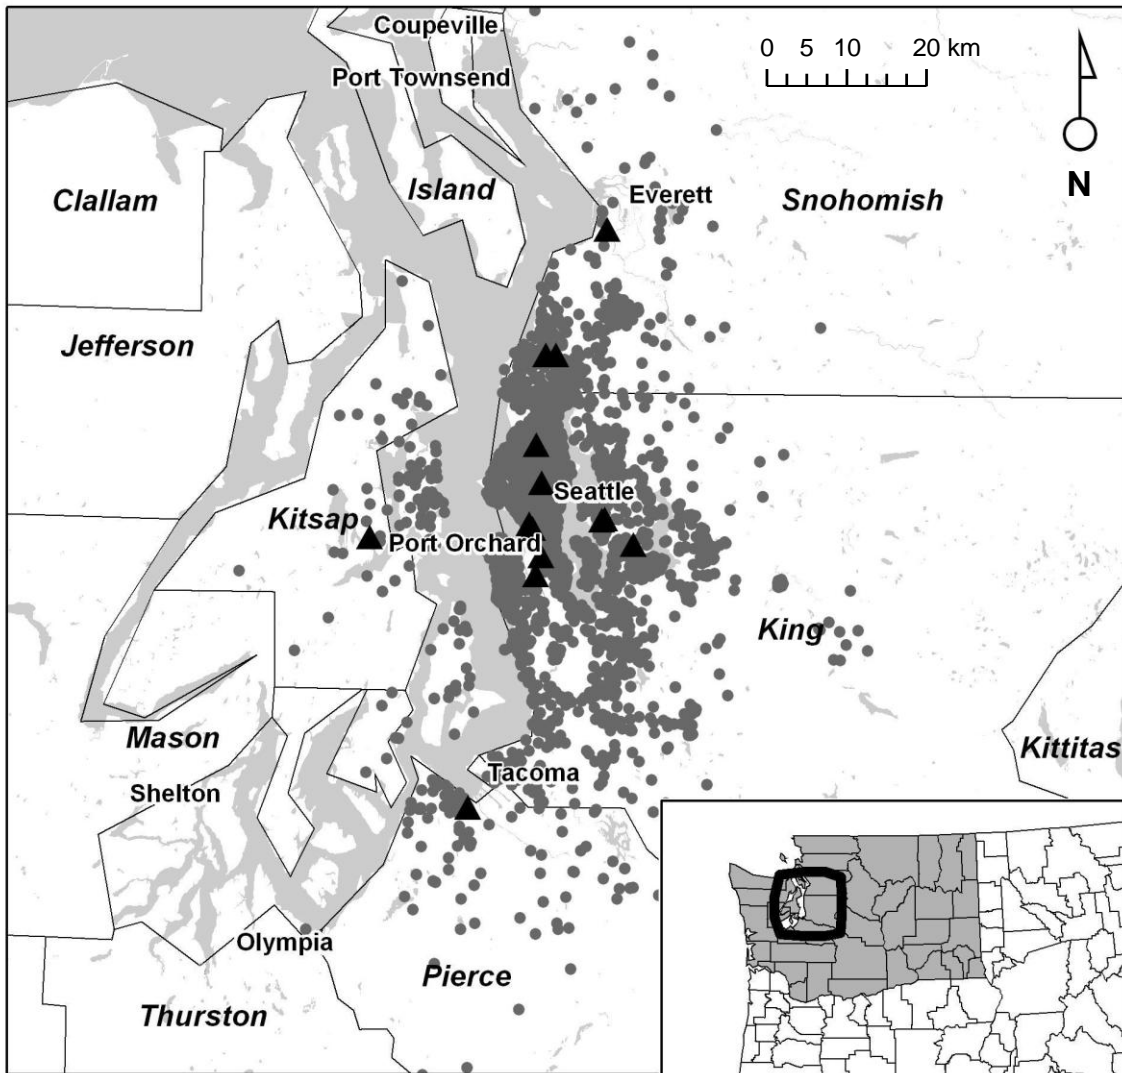

Supplement: kwq022_2.pdf [file kwq022_2.pdf]
